# Supplementary material for: Water Use Efficiency and Economic Evaluation of the Hydroponic versus Conventional Cultivation Systems for Green Fodder Production in Saudi Arabia
Source: MDPI journal article supplement (doi:10.3390/su15010822), 2023-01-03
Supplement: s1 [file s1]

**Supplementary Table S (1, 2, 3, 4)**  
**Fixed and variable cost for barely fodder production in greenhouse hydroponic  
and open field systems**

Table S1. 1-Fixed cost for hydroponic system for fodder production.

| Total area of greenhouse (261 m <sup>2</sup> ) |                                              |              |                 |                    |               |                |                    |
|------------------------------------------------|----------------------------------------------|--------------|-----------------|--------------------|---------------|----------------|--------------------|
| Item No.                                       | Item name                                    | No. of units | Unit cost (USD) | Initial Cost (USD) | Expected life | Residual (USD) | Depreciation (USD) |
| 1                                              | Cement bags (50 kg/unit)                     | 30           | 4.27            | 128                | 60            | 0              | 2.1                |
| 2                                              | Gravel bags ( 27 m <sup>3</sup> /unit)       | 2            | 266.65          | 533.3              | 60            | 0              | 8.9                |
| 3                                              | Two insulated partitions with poly-strene    | 10           | 134.4           | 1344               | 30            | 0              | 44.8               |
| 4                                              | An insulated entrance                        | 1            | 200             | 200                | 30            | 0              | 6.7                |
|                                                | Cooling system                               | 1            | 933.3           | 933.3              | 10            |                | 93.3               |
|                                                | Greenhouse roof insulation                   | 1            | 933.3           | 933.3              | 30            | 93.3           | 40                 |
|                                                | Green fodder production system+ installation | 2            | 24545.05        | 49090.1            | 60            | 2321.1         | 779.5              |
|                                                | Irrigation and washing system                | 1            | 725.3           | 725.3              | 10            | 0              | 72.5               |
| <b>Owner's time (opportunity cost)</b>         |                                              |              |                 |                    |               |                | 533.3              |
| <b>Land rent (opportunity cost)</b>            |                                              |              |                 |                    |               |                | 5.4                |
| <b>Fixed cost/year</b>                         |                                              |              |                 |                    |               |                | 1035.8             |

|                                                                           |        |
|---------------------------------------------------------------------------|--------|
| <b>Fixed cost/production period (77 days) including opportunity costs</b> | 756.3  |
| <b>Area of production (m<sup>2</sup>)</b>                                 | 190.96 |
| <b>Fixed cost/m<sup>2</sup></b>                                           | 3.96   |

**Table S2.** 2-Variable cost for hydroponic system for fodder production.

| <b>Item No.</b> | <b>Variable items</b>                    | <b>Quantity</b> | <b>Unit cost USD</b> | <b>Total Cost USD</b> |
|-----------------|------------------------------------------|-----------------|----------------------|-----------------------|
| <b>1</b>        | Barley seeds (kg)                        | 86.19           | 0.3734               | 32.18                 |
| <b>2</b>        | Filtered irrigation water (L)            | 700.00          | 0.2683               | 187.81                |
| <b>3</b>        | Electricity (kw hr <sup>-1</sup> )       | 3130.17         | 0.06                 | 187.81                |
| <b>4</b>        | Antiseptic solution (Colorax) (L)        | 11.00           | 1.3327               | 14.66                 |
| <b>5</b>        | Labors and tech (hour)                   | 85.33           | 4                    | 341.31                |
| <b>7</b>        | Marketing cost (Packing + Transport)     |                 |                      | 133.33                |
|                 | Total (USD)                              |                 |                      | 897.1                 |
|                 | Area of production (m <sup>2</sup> )     |                 |                      | 190.96                |
|                 | Variable cost per m <sup>2</sup> (USD)   |                 |                      | 4.7                   |
|                 | Dry fodder yield per m <sup>2</sup> (kg) |                 |                      | 41.8                  |
|                 | Price per kg (USD)                       |                 |                      | 0.2                   |

**Table S3.** 3-Fixed cost for traditional open field system.

| <b>Item name</b>               | <b>No. of units</b> | <b>Initial cost (USD)</b> | <b>Residual (USD)</b> | <b>Useful life</b> | <b>Fixed cost (USD)</b> |
|--------------------------------|---------------------|---------------------------|-----------------------|--------------------|-------------------------|
| <b>Irrigation pump (2 H.P)</b> | 1                   | 86.7                      | 3.5                   | 7                  | 11.88                   |
| <b>Timer</b>                   | 1                   | 80                        | 0                     | 6                  | 13.33                   |
| <b>Solenoid valves</b>         | 10                  | 20                        | 0                     | 6                  | 3.33                    |
| <b>Filter (200 mesh)</b>       | 1                   | 6.7                       | 0                     | 7                  | 0.952                   |
| <b>Material for irrigation</b> | 1                   | 68.7                      | 0                     | 6                  | 11.44                   |

|                                                                    |  |  |  |  |        |
|--------------------------------------------------------------------|--|--|--|--|--------|
| system net                                                         |  |  |  |  |        |
| Owner's time (opportunity cost)                                    |  |  |  |  | 186.66 |
| Land rent (opportunity cost)                                       |  |  |  |  | 10.56  |
| Fixed cost/year                                                    |  |  |  |  | 238.19 |
| Fixed cost/production period (77 days) including opportunity costs |  |  |  |  | 50.03  |
| Area of production m <sup>2</sup>                                  |  |  |  |  | 108    |
| Fixed cost/m <sup>2</sup>                                          |  |  |  |  | 0.45   |

**Table S4.** 4-Variable cost for traditional open field.

| Item No. | Variable items                           | Quantity | Unit cost USD | Total Cost USD |
|----------|------------------------------------------|----------|---------------|----------------|
| 1        | Barley seeds (kg)                        | 9.99     | 0.3734        | 3.73           |
| 2        | Filtered irrigation water (L)            | 19.87    | 0.2683        | 5.33           |
| 3        | Electricity (kw hr <sup>-1</sup> )       | 67.83    | 0.06          | 4.07           |
| 4        | Labors and tech (hour)                   | 15.01    | 1.3327        | 20.0           |
| 5        | Fertilizers                              | 3.333    | 4             | 13.33          |
| 6        | Marketing cost (Packing + Transport)     |          |               | 8.00           |
|          | Total (USD)                              |          |               | 54.46          |
|          | Area of production (m <sup>2</sup> )     |          |               | 108            |
|          | Variable cost per m <sup>2</sup> (USD)   |          |               | 0.48           |
|          | Dry fodder yield per m <sup>2</sup> (kg) |          |               | 5.6            |
|          | Price per kg (USD)                       |          |               | 0.2            |
